# Supplementary material for: A mixotrophic preculture strategy enhances biomass and astaxanthin productivity of Chromochloris zofingiensis
Source: Research Square preprint supplement (doi:10.21203/rs.3.rs-2199170/v1), 2022-10-29
Supplement: Supplementary file 1 [file 2701c227410858ef1a372cb7.docx]

**Figures**

Fig. A1. Volcano plot of DEGs. (a)AP/MP. (b) HP/MP (c)HP/AP.

Fig. A2. KEGG pathway classification and enrichment of AP/MP DEGs. (a) KEGG pathway classification of AP/MP. (b) KEGG pathway functional enrichment of AP/MP. Rich factor indicates the ratio of DEGs to all genes in that pathway.

Fig. A3. Transcriptional regulation of “photosynthesis-antenna protein” KEGG pathway. The red and blue boxes indicate up-regulation and down-regulation respectively.

Fig. A4. Hierarchical cluster analysis of DEGs responding to preculture strategy in enriched KEGG pathways (AP/MP).

Fig. A1. Volcano plot of DEGs. (a)AP/MP. (b) HP/MP (c)HP/AP.

(a)
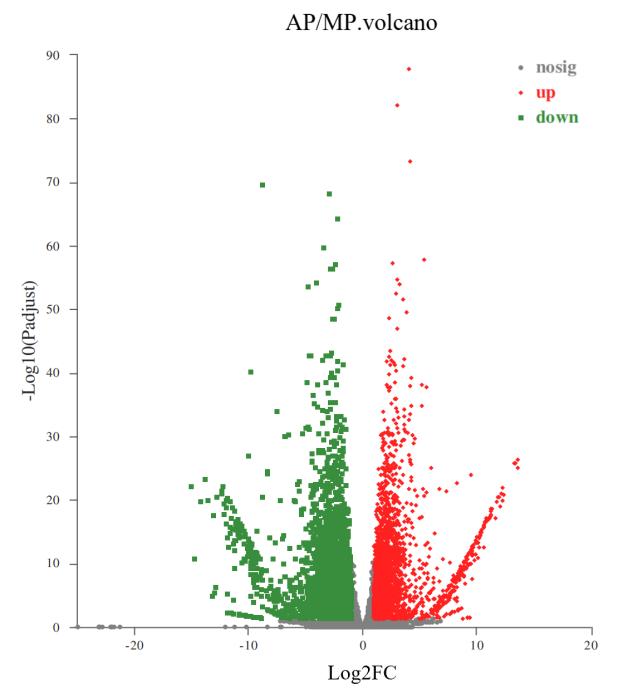
(b)
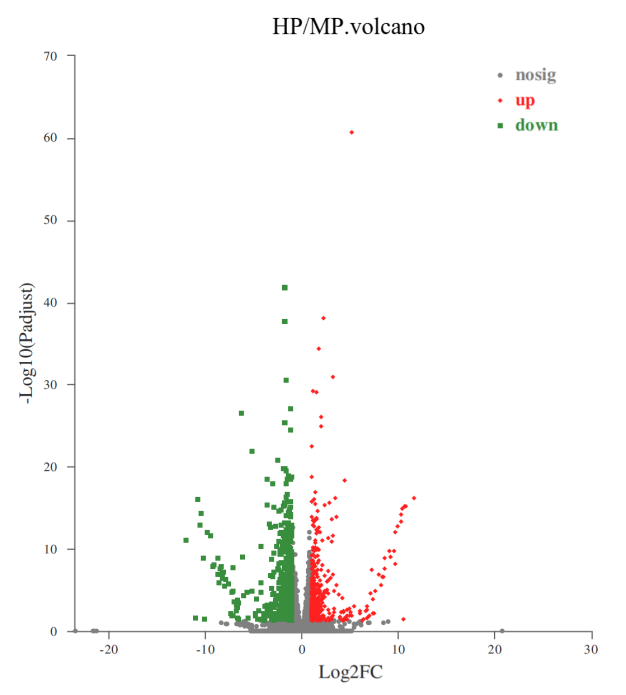


(c)
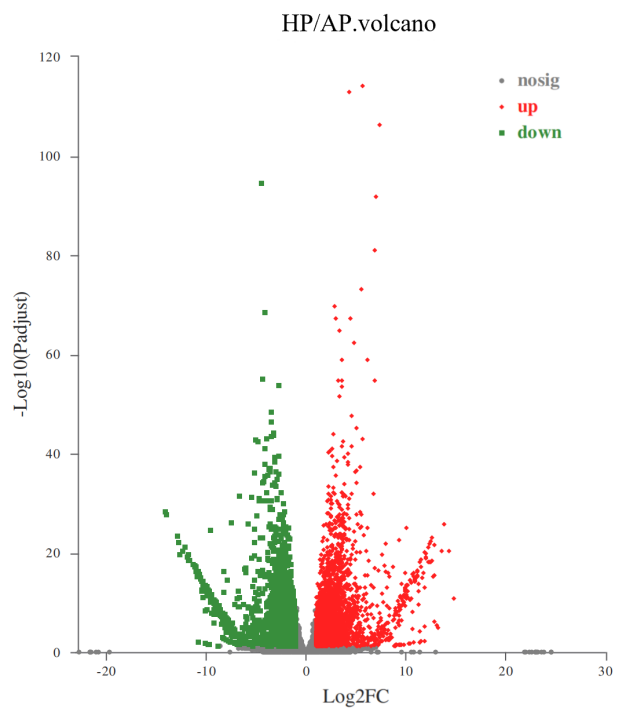


Fig. A2. KEGG pathway classification and enrichment of AP/MP DEGs. (a) KEGG pathway classification of AP/MP. (b) KEGG pathway functional enrichment of AP/MP. Rich factor indicates the ratio of DEGs to all genes in that pathway.

1.
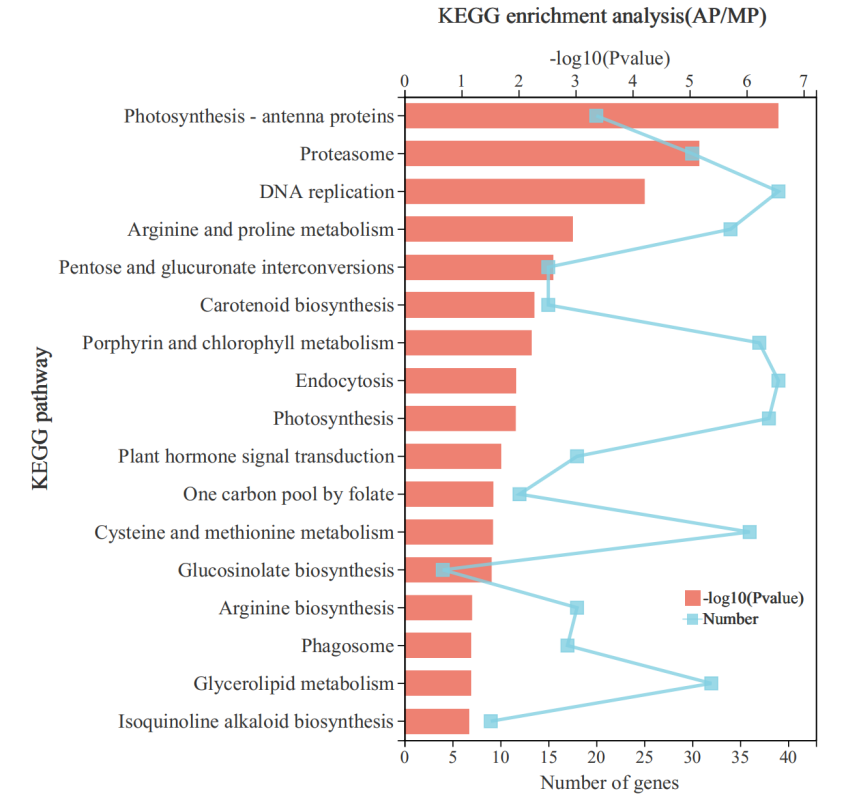

2.
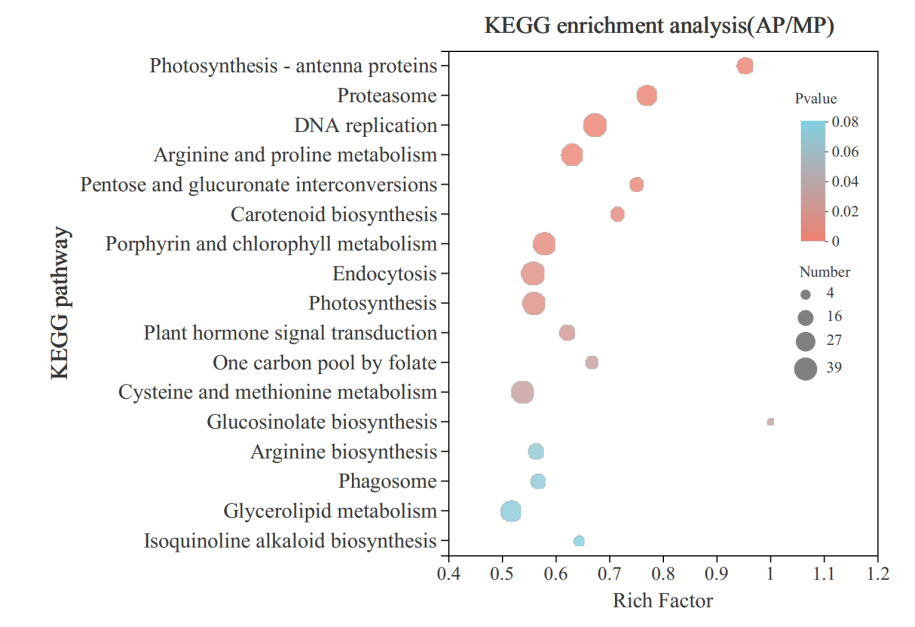


Fig. A3. Transcriptional regulation of “photosynthesis-antenna protein” KEGG pathway. The red and blue boxes indicate up-regulation and down-regulation respectively.


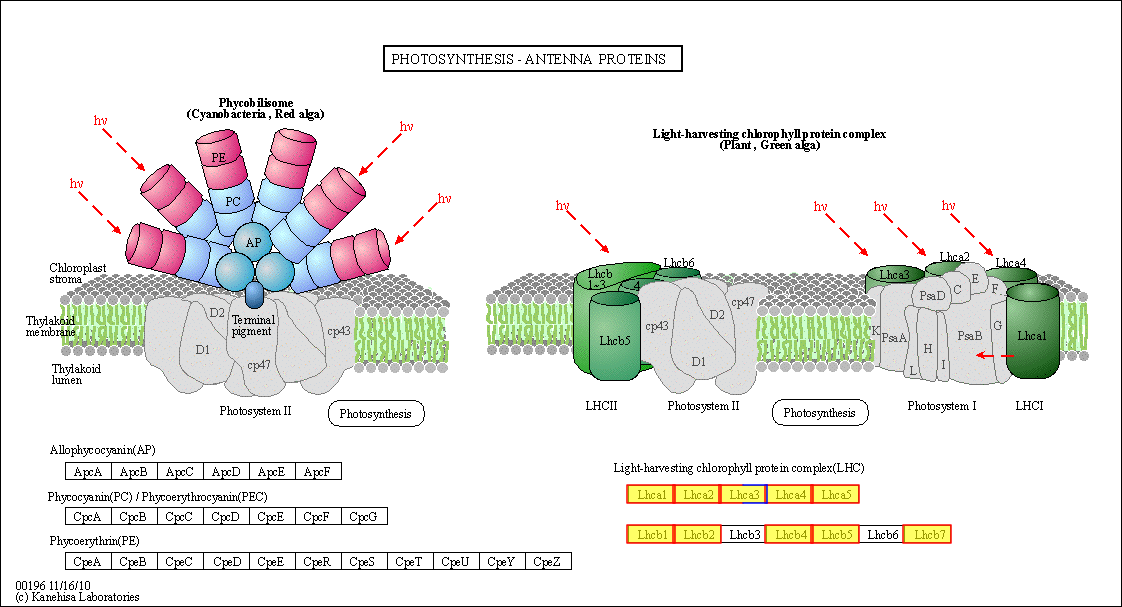


Fig. A4. Hierarchical cluster analysis of DEGs responding to preculture strategy in enriched KEGG pathways (AP/MP).


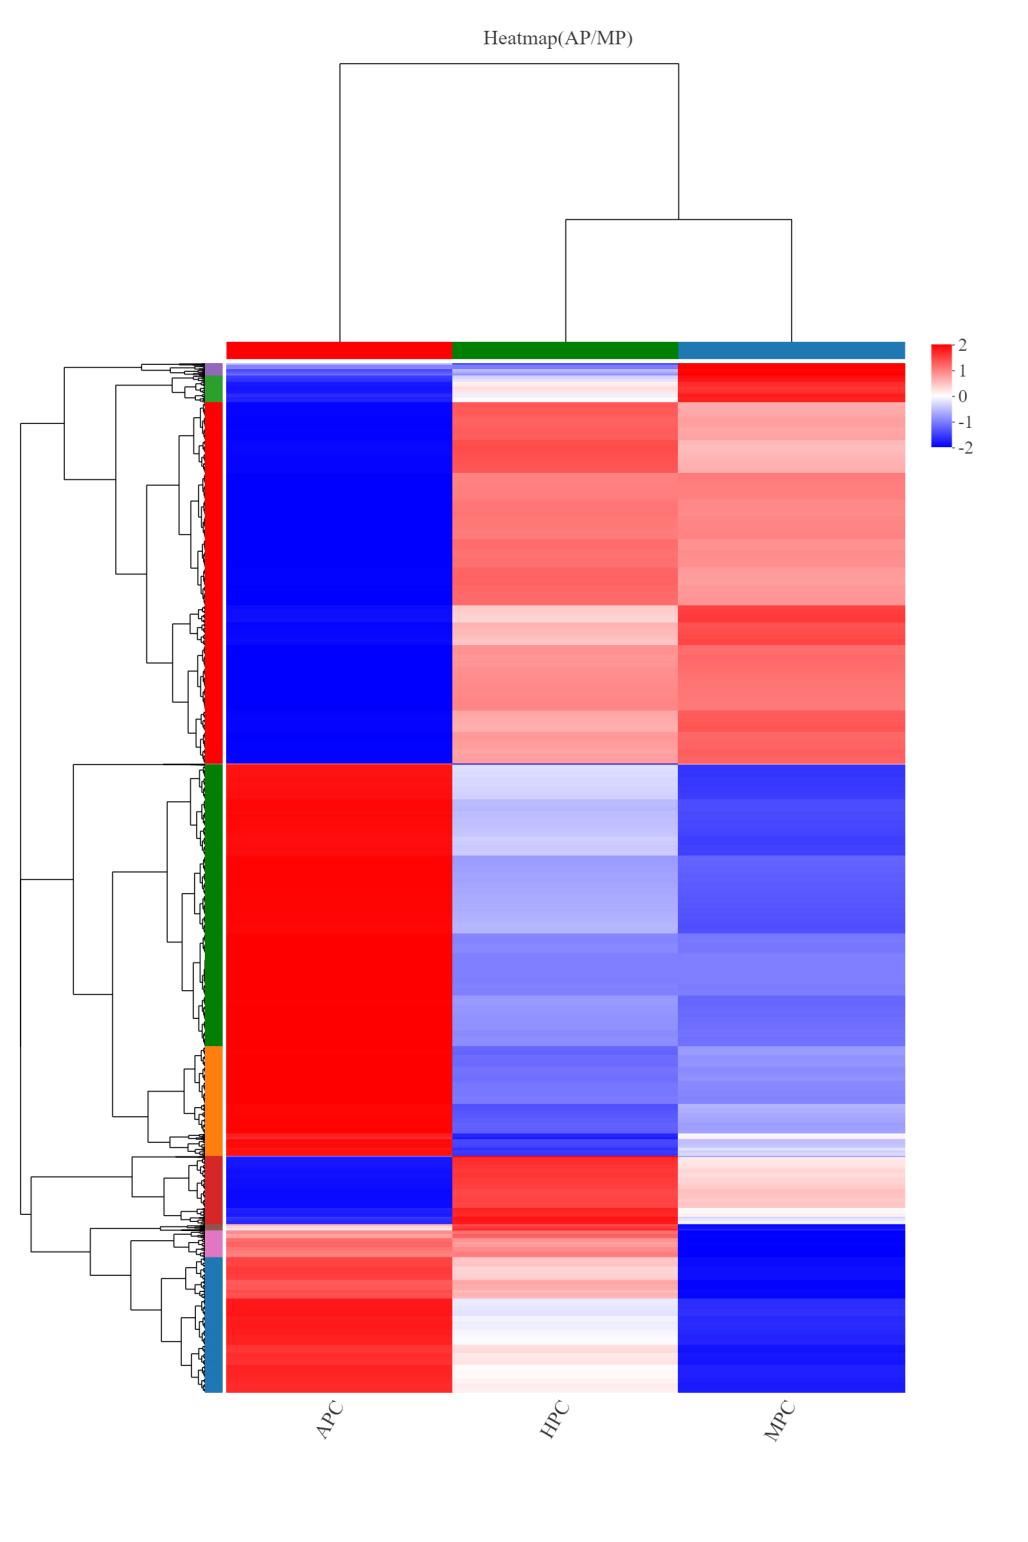


**Tables**

Table A1 Expression patterns of genes involved in TAG, astaxanthin biosynthesis and central carbon mechanism.

Table A2 Amino acid composition of heterotrophic cultured *C. zofngiensis* after MP.

Table A1 Expression patterns of genes involved in TAG, astaxanthin biosynthesis and central carbon mechanism

| Gene ID | Annotation | Abbreviation | log 2 FC | | |
| --- | --- | --- | --- | --- | --- |
| AP/MP | HP/AP | HP/MP |
| **FA biosynthesis** | |  |  |  |  |
| Cz02g12030 | carboxyltransferase subunit alpha  (ACCase complex) | *α-CT* | -0.45 | 0.73 | 0.29 |
| Cz02g17060 | carboxyltransferase subunit beta  (ACCase complex) | *β-CT* | -0.05 | 0.55 | 0.51 |
| Cz03g28270 | biotin carboxyl carrier protein  (ACCase complex) | *BCCP1* | -0.83 | 0.80 | -0.02 |
| Cz06g20040 | biotin carboxyl carrier protein  (ACCase complex) | *BCCP2* | 0.74 | 0.09 | 0.83 |
| Cz13g10110 | biotin carboxylase  (ACCase complex) | *BC* | -1.53 | 1.38 | -0.13 |
| Cz19g10190 | acetyl-CoA carboxylase | *ACCase* | -0.59 | 0.79 | 0.22 |
| Cz09g30220 | acyl carrier protein | *ACP1* | -0.89 | 0.93 | 0.05 |
| Cz07g17120 | acyl carrier protein | *ACP2* | -1.11 | 0.98 | -0.11 |
| Cz13g05150 | malonyl-CoA:Acyl carrier protein transacylase | *MCT1* | -2.29 | 2.10 | -0.17 |
| Cz04g37050 | malonyl-CoA:Acyl carrier protein transacylase | *MCT2* | 0.99 | -2.29 | -1.27 |
| UNPLg00257 | 3-oxoacyl-[acyl-carrier-protein] synthase, II  (C16:0 to C18:0) | *KAS II* | -1.54 | 1.25 | -0.27 |
| Cz02g14160 | 1. oxoacyl-[acyl-carrier-protein] synthase, I   (C4:0 to up to C16:0) | *KAS I* | -3.17 | 2.78 | -0.37 |
| Cz18g03070 | 3-oxoacyl-[acyl-carrier-protein] synthase, III  (C2:0 to C4:0) | *KAS III* | -1.00 | 1.05 | 0.07 |
| Cz06g14030 | 3-oxoacyl-[acyl-carrier-protein] synthase, II | *KAS II* | -0.66 | 0.69 | 0.04 |
| Cz01g34370 | 3-oxoacyl-[acyl-carrier protein] reductase | *KAR1* | -2.48 | 2.53 | 0.06 |
| Cz16g00050 | 3-oxoacyl-[acyl-carrier protein] reductase | *KAR2* | -0.64 | 0.56 | -0.06 |
| Cz10g18200 | 3-oxoacyl-[acyl-carrier protein] reductase | *KAR3* | 1.55 | -1.10 | 0.47 |
| Cz03g39140 | 3-oxoacyl-[acyl-carrier protein] reductase? | *KAR4* | 1.48 | -2.06 | -0.57 |
| Cz15g00050 | 3-oxoacyl-[acyl-carrier protein] reductase | *KAR5* | -0.43 | -0.09 | -0.51 |
| Cz04g17270 | 3-oxoacyl-[acyl-carrier protein] reductase | *KAR6* | 1.82 | -1.20 | -0.60 |
| Cz11g27250 | 3-oxoacyl-[acyl-carrier protein] reductase? | *KAR7* | 0.56 | -1.33 | -0.75 |
| Cz01g09160 | 3-hydroxyacyl-[acyl-carrier-protein] dehydratase | *HAD* | -2.87 | 1.79 | -1.06 |
| Cz11g20040 | enoyl-[acyl-carrier protein] reductase | *ENR* | -2.69 | 1.54 | -1.14 |
| **FA desaturation** | |  |  |  |  |
| Cz04g09090 | acyl-[acyl-carrier-protein] desaturase | *SAD1* | -4.16 | 3.35 | -0.79 |
| Cz13g17200 | acyl-[acyl-carrier-protein] desaturase | *SAD2* | 0.47 | -0.92 | -0.44 |
| **TAG synthesis** | |  |  |  |  |
| Cz11g03260 | glycerol-3-phosphate acyltransferase | *GPAT1* | 8.96 | -9.90 | -0.91 |
| Cz09g31330 | glycerol-3-phosphate acyltransferase | *GPAT2* | -0.97 | 0.93 | -0.02 |
| Cz16g02090 | 1-acyl-sn-glycerol-3-phosphate acyltransferase | *LPAAT1* | 10.00 | -10.00 | 0.02 |
| Cz10g20070 | 1-acyl-sn-glycerol-3-phosphate acyltransferase | *LPAAT2* | 0.17 | -0.27 | -0.08 |
| Cz05g23060 | phosphatidate phosphatase, Lipin | *PAP1* | 0.70 | -0.19 | 0.53 |
| Cz10g16040 | phosphatidate phosphatase | *PAP2* | 5.24 | -4.97 | 0.29 |
| Cz16g11240 | phosphatidate phosphatase | *PAP3* | -1.78 | 3.69 | 1.91 |
| Cz10g01120 | 2-acylglycerol O-acyltransferase | *MGAT* | 7.13 | -7.38 | -0.22 |
| Cz06g05010 | Diacylglycerol O-acyltransferase, type I | *DGAT1A* | -2.15 | 2.05 | -0.08 |
| Cz09g08290 | Diacylglycerol O-acyltransferase, type I | *DGAT1B* | 1.78 | -1.53 | 0.27 |
| Cz06g35060 | Diacylglycerol O-acyltransferase, type II | *DGTT1* | -0.88 | 1.76 | 0.91 |
| Cz06g22030 | Diacylglycerol O-acyltransferase, type II | *DGTT2* | -0.46 | -0.35 | -0.78 |
| Cz09g23010 | Diacylglycerol O-acyltransferase, type II | *DGTT3* | -0.56 | 3.49 | 2.95 |
| Cz11g24150 | Diacylglycerol O-acyltransferase, type II | *DGTT4* | 2.73 | -3.24 | -0.49 |
| Cz09g27290 | Diacylglycerol O-acyltransferase, type II | *DGTT5* | -3.16 | 2.56 | -0.59 |
| Cz15g22140 | Diacylglycerol O-acyltransferase, type II | *DGTT6* | -12.26 | 12.35 | 0.00 |
| Cz11g21100 | Diacylglycerol O-acyltransferase, type II | *DGTT7* | -1.89 | 0.52 | -1.35 |
| Cz08g14220 | phospholipid:diacylglycerol acyltransferase | *DGTT8* | -0.01 | 0.21 | 0.21 |
| **Carotenoids synthesis** | |  |  |  |  |
| Cz02g35280 | 1-deoxy-D-xylulose 5-phosphate synthase  (DOXP synthase) | *DXS* | 1.25 | -1.02 | 0.24 |
| Cz07g19130 | 1-deoxy-D-xylulose 5-phosphate reductoisomerase | *DXR* | 0.60 | -1.01 | -0.40 |
| Cz12g10090 | 2-C-methyl-D-erythritol 4-phosphate cytidylyltransferase | *CMS* | 9.12 | -8.48 | 0.67 |
| Cz11g24270 | 4-diphosphocytidyl-2-C-methyl-D-erythritol kinase | *CMK* | -0.02 | -0.26 | -0.27 |
| Cz02g10180 | 2-C-methyl-D-erythritol 2,4-cyclodiphosphate synthase | *MCS* | 5.23 | -5.92 | -0.68 |
| Cz13g08020 | 4-hydroxy-3-methylbut-2-en-1-yl  diphosphate synthase | *HDS* | 0.36 | -0.60 | -0.23 |
| Cz05g23010 | 1. hydroxy-3-methylbut-2-enyl   diphosphate reductase | *HDR* | 0.57 | -0.88 | -0.30 |
| Cz04g25080 | Acetoacetyl-CoA thiolase | *AACT* | -0.70 | 0.28 | -0.40 |
| Cz19g02060 | Hydroxymethylglutaryl-CoA synthase  (HMG-CoA synthase) | *HCS* | 1.12 | -1.67 | -0.54 |
| Cz03g02150 | Isopentenyl-diphosphate Delta-isomerase | *IPPI* | 0.37 | 0.13 | 0.52 |
| Cz02g31110 | geranyl diphosphate synthase | *GPPS* | 0.32 | -0.22 | 0.12 |
| Cz01g03190 | farnesyl diphosphate synthase | *FPPS* | -0.82 | 0.63 | -0.18 |
| Cz02g19200 | geranylgeranyl diphosphate synthase | *GGPPS* | 1.76 | -1.81 | -0.03 |
| Cz05g32220 | phytoene synthase (chloroplastic) | *PSY* | 5.62 | -5.24 | 0.40 |
| Cz02g32280 | phytoene desaturase | *PDS* | 3.47 | -2.64 | 0.86 |
| Cz10g17010 | Zeta-carotene desaturase (chloroplastic) | *ZDS* | 2.22 | -1.68 | 0.55 |
| Cz10g17130 | Zeta-carotene isomerase | *ZISO* | 2.38 | -1.74 | 0.65 |
| Cz16g01210 | carotenoid isomerase | *CRTISO1* | 3.33 | -3.53 | -0.17 |
| Cz12g03260 | carotenoid isomerase | *CRTISO2* | -1.19 | 1.19 | 0.02 |
| Cz14g22040 | carotenoid isomerase | *CRTISO3* | 1.61 | -1.33 | 0.29 |
| Cz09g18310 | Lycopene epsilon cyclase | *LCYe* | 1.25 | -1.86 | -0.59 |
| Cz12g10170 | Lycopene beta cyclase | *LCYb* | 0.70 | -0.18 | 0.54 |
| Cz13g16110 | cytochrome P450 beta hydroxylase,CYP97A5(Cr) | *CYP97A* | 4.03 | -3.57 | 0.48 |
| Cz09g07100 | cytochrome P450 epsilon hydroxylase, CYP97C3 | *CYP97C* | 2.44 | -2.76 | -0.30 |
| Cz09g14130 | Cytochrome P450 CYP97B,  beta or seta-rings (At) | *CYP97A* | 0.74 | -0.64 | 0.12 |
| Cz12g16080 | beta-carotene hydroxylase | *CHYb* | 0.45 | -0.18 | 0.28 |
| Cz13g13100 | beta-carotene ketolase/oxygenase | *BKT1* | 1.23 | -0.74 | 0.50 |
| Cz04g11250 | beta-carotene ketolase/oxygenase | *BKT2* | 0.95 | -0.46 | 0.50 |
| Cz07g30060 | zeaxanthin epoxidase | *ZEP* | 2.18 | -1.83 | 0.37 |
| Cz06g02070 | violaxanthin de-epoxidase | *VDE* | -0.10 | -0.28 | -0.36 |
| Cz02g29020 | Long-chain-alcohol O-fatty-acyltransferase | *AAT?* | 1.38 | -1.04 | 0.36 |
| **OPP Pathway** | |  |  |  |  |
| Cz06g12080 | Glucose-6-phosphate 1-dehydrogenase | *G6PD1* | 0.27 | -0.45 | -0.17 |
| Cz03g12030 | Glucose-6-phosphate 1-dehydrogenase | *G6PD2* | 1.45 | -1.46 | -3.71 |
| Cz04g18010 | 6-phosphogluconolactonase | *PGLS1* | 0.58 | -0.05 | 0.55 |
| Cz11g03250 | 6-phosphogluconolactonase | *PGLS2* | -1.38 | 2.43 | 1.05 |
| Cz05g06160 | 6-phosphogluconate dehydrogenase | *6PGD* | -2.32 | 1.77 | -0.53 |
| Cz05g13260 | ribose 5-phosphate isomerase | *RPI1* | -5.36 | 5.45 | 0 |
| Cz09g17220 | ribose 5-phosphate isomerase | *RPI2* | 0.23 | -0.57 | -0.32 |
| Cz05g11190 | ribulose-phosphate 3-epimerase | *RPE1* | 2.33 | -1.66 | 0.69 |
| Cz04g31230 | ribulose-phosphate 3-epimerase | *RPE2* | 1.15 | -0.88 | 0.29 |
| Cz14g07140 | ribulose-phosphate 3-epimerase | *RPE3* | 2.33 | -1.99 | 0.36 |
| Cz03g04080 | transketolase | *TRK* | 1.94 | -2.01 | -0.05 |
| Cz06g25040 | transaldolase | *TAL1* | 0.20 | -0.82 | -0.61 |
| Cz04g12210 | transaldolase | *TAL2* | 0.37 | -0.15 | 0.24 |
| Cz12g20290 | transaldolase | *TAL3* | -2.29 | 2.41 | 0.13 |
| **Glycolysis and Glucogenesis** | |  |  |  |  |
| Cz13g07170 | hexokinase | *HK* | -0.73 | 1.32 | 0.60 |
| Cz06g03010 | glucokinase | *GK* | -2.24 | 1.22 | -1.00 |
| Cz01g30020 | glucose-6-phosphate isomerase | *PGI* | -0.00 | 0.04 | 0.05 |
| Cz09g25120 | 6-phosphofructokinase | *PFK1* | -1.08 | 0.58 | -0.48 |
| Cz16g11260 | 6-phosphofructokinase | *PFK2* | -1.36 | 2.49 | 1.14 |
| Cz07g13120 | 6-phosphofructokinase | *PFK3* | -1.54 | 0.93 | -0.58 |
| Cz04g03070 | Fructose-1,6-bisphosphatase, class I | *FBP1* | 2.52 | -2.49 | 0.04 |
| Cz05g01180 | Fructose-1,6-bisphosphatase, class II | *FBP2* | 0.71 | 0.91 | 1.63 |
| Cz05g37140 | Fructose-bisphosphate aldolase | *FBA1* | 0.89 | -1.05 | -0.15 |
| Cz06g07090 | Fructose-bisphosphate aldolase | *FBA2* | 0.11 | -0.72 | -0.59 |
| Cz03g06050 | Fructose-bisphosphate aldolase | *FBA3* | 0.63 | -0.46 | 0.19 |
| Cz03g13070 | Fructose-bisphosphate aldolase | *FBA4* | -2.42 | 1.66 | -0.76 |
| Cz06g17270 | triosephosphate isomerase | *TIM* | -0.28 | 0.18 | -0.08 |
| Cz05g34160 | glyceraldehyde 3-phosphate dehydrogenase (NAD) | *GAPDH* | -2.26 | 2.35 | 0.10 |
| Cz16g19260 | phosphoglycerate kinase | *PGK* | 0.38 | -0.87 | -0.47 |
| Cz06g01110 | phosphoglycerate mutase, 2,3-bisphosphoglycerate-dependent | *PGAM1* | -2.81 | 2.28 | -0.51 |
| Cz09g03220 | phosphoglycerate mutase, 2,3-bisphosphoglycerate-independent | *PGAM2* | 0.15 | -0.29 | -0.12 |
| Cz04g11130 | phosphoglycerate mutase, 2,3-bisphosphoglycerate-independent | *PGAM3* | -3.66 | 3.38 | -0.26 |
| Cz08g21030 | phosphoglycerate mutase, 2,3-bisphosphoglycerate-independent | *PGAM4* | -0.86 | -0.23 | 1.08 |
| Cz14g01200 | phosphoglycerate mutase | *PGAM5* | 0.66 | -0.99 | -0.32 |
| Cz14g08090 | phosphoglycerate mutase | *PGAM6* | 0.56 | -0.50 | 0.07 |
| Cz01g38050 | phosphoglycerate mutase | *PGAM7* | -0.95 | 1.35 | 0.41 |
| Cz05g10010 | enolase | *ENO* | -1.64 | 1.20 | -0.42 |
| UNPLg00362 | pyruvate kinase | *PK1* | 0.38 | -0.68 | -0.28 |
| Cz08g12170 | pyruvate kinase | *PK2* | 1.75 | -1.90 | -0.13 |
| Cz16g00040 | pyruvate kinase | *PK3* | -0.79 | 0.68 | -0.10 |
| Cz14g14130 | pyruvate kinase | *PK4* | 1.75 | -1.26 | 0.50 |
| Cz04g17050 | pyruvate kinase | *PK5* | -1.41 | 1.54 | 0.15 |
| Cz01g21060 | pyruvate kinase | *PK6* | -1.42 | 2.24 | 0.82 |
| Cz15g09100 | pyruvate kinase | *PK7* | -0.28 | 0.28 | 0.02 |
| Cz10g06190 | pyruvate kinase | *PK8* | 0.63 | -1.10 | -0.45 |
| Cz01g05160 | phosphoenolpyruvate carboxykinase (ATP) | *PEPCK* | 0.30 | 1.83 | 2.15 |
| Cz04g02090 | pyruvate carboxylase | *PYC* | 0.47 | -0.21 | 0.28 |
| **TCA** | |  |  |  |  |
| Cz02g27080 | citrate synthase | *CIS1* | 0.08 | 0.94 | 1.03 |
| Cz02g12210 | citrate synthase | *CIS2* | -3.90 | 2.57 | -1.32 |
| Cz13g00140 | aconitate hydratase | *ACH* | 0.34 | -0.31 | 0.05 |
| Cz11g28180 | isocitrate dehydrogenase, NAD-dependent | *IDH1* | -2.66 | 1.96 | -0.68 |
| Cz11g08120 | isocitrate dehydrogenase, NAD-dependent | *IDH2* | -1.57 | 0.86 | -0.70 |
| Cz12g16160 | isocitrate dehydrogenase, NADP-dependent | *IDH3* | 0.31 | -0.70 | -0.38 |
| Cz05g03220 | 2-oxoglutarate dehydrogenase, E1 | *OGDH1* | -1.08 | 0.37 | -0.69 |
| Cz01g28100 | 2-oxoglutarate dehydrogenase, E1 | *OGDH2* | 1.41 | -0.95 | 0.48 |
| Cz02g11010 | 2-oxoglutarate dehydrogenase, E2 | *OGDH3* | -1.84 | 0.75 | -1.07 |
| Cz01g33150 | succinyl-CoA synthetase, alpha subunit | *SCSa* | -1.20 | 0.22 | -0.97 |
| Cz03g31200 | succinyl-CoA synthetase, beta subunit | *SCSb* | -2.19 | 1.33 | -0.84 |
| Cz15g13230 | succinate dehydrogenase (ubiquinone)  iron-sulfur subunit | *SDH1* | -0.83 | 1.14 | 0.32 |
| Cz07g14020 | succinate dehydrogenase (ubiquinone)  cytochrome b560 subunit | *SDH2* | -1.79 | 1.76 | -0.01 |
| Cz07g14015 | succinate dehydrogenase (ubiquinone)  membrane anchor subunit | *SDH3* | -1.01 | 0.91 | -0.08 |
| Cz07g04030 | fumarate hydratase, class I | *FHD* | 0.07 | 0.05 | 0.14 |
| Cz02g21340 | malate dehydrogenase (NAD) | *MDH* | -2.45 | 1.25 | -1.18 |
| **Acetyl CoA source** | |  |  |  |  |
| Cz18g13050 | pyruvate dehydrogenase, E1 alpha | *PDHC1* | -0.38 | 0.23 | -0.13 |
| Cz07g25130 | pyruvate dehydrogenase, E1 beta | *PDHC2* | -1.66 | 1.39 | -0.25 |
| Cz03g08090 | pyruvate dehydrogenase, E1 alpha | *PDHC3* | -0.72 | 0.72 | 0.02 |
| Cz01g37230 | pyruvate dehydrogenase, E1 beta | *PDHC4* | -1.57 | 1.76 | 0.21 |
| Cz05g28130 | pyruvate dehydrogenase, E2  (dihydrolipoamide acetyltransferase) | *PDHC5* | -3.26 | 2.97 | -0.27 |
| Cz10g25060 | pyruvate dehydrogenase, E3  (dihydrolipoamide dehydrogenase) | *PDHC6* | -0.48 | 0.25 | -0.21 |
| Cz07g16120 | pyruvate dehydrogenase, E3  (dihydrolipoamide dehydrogenase) | *PDHC7* | -0.35 | 0.45 | 0.11 |
| Cz01g33100 | Pyruvate decarboxylase | *PDC* | -0.25 | -0.48 | -0.72 |
| Cz11g04290 | aldehyde dehydrogenase (NAD+) | *ALDH1* | -1.29 | 0.63 | -0.64 |
| Cz03g20090 | aldehyde dehydrogenase (NAD+) | *ALDH2* | -0.59 | -0.09 | -0.66 |
| Cz05g18170 | aldehyde dehydrogenase | *ALDH3* | 0.10 | -0.61 | -0.49 |
| Cz09g15060 | acetyl-CoA synthetase | *ACS1* | -1.05 | 0.50 | -0.53 |
| Cz12g10100 | acetyl-CoA synthetase | *ACS2* | 0.87 | -0.12 | 0.77 |

Table A2 Amino acid composition of heterotrophic cultured *C. zofngiensis* after MP.

| Amino acid | Composition (%) |
| --- | --- |
| Asp | 9.97679 |
| Ser | 2.90932 |
| Glu | 14.18904 |
| Gly | 5.90862 |
| His | 2.96564 |
| Arg | 10.89968 |
| Thr | 2.01309 |
| Ala | 9.25401 |
| Pro | 6.02178 |
| Cys | 0 |
| Tyr | 0 |
| Val | 9.6075 |
| Met | 0 |
| Lys | 6.31571 |
| Ile | 5.60607 |
| Leu | 8.79234 |
| Phe | 5.54043 |
