# Supplementary material for: A mixotrophic preculture strategy enhances biomass and astaxanthin productivity of Chromochloris zofingiensis
Source: Research Square preprint supplement (doi:10.21203/rs.3.rs-2199170/v1), 2022-10-29
Supplement: Supplementary file 2 [file a97cc14efd4f51d1100f17e2.docx]

**Annotation of abbreviations**

AcCoA, acetyl-coenzyme A; ACCase, AcCoA carboxylase; CT, carboxyltransferase subunit; BCCP, biotin carboxyl carrier protein; BC, biotin carboxylase; MCT, malonyl-CoA:Acyl carrier protein transacylase; KAS, 3-oxoacyl-[acyl-carrier-protein] synthase; KAR, 3-oxoacyl-[acyl-carrier protein] reductase; HAD, 3-hydroxyacyl-[acyl-carrier-protein] dehydratase; ENR, enoyl-[acyl-carrier protein] reductase; SAD, Acyl-[acyl-carrier-protein] desaturase; FAT, acyl carrier protein thioesterase; LCAS, long-chain AcCoA synthetase; GPAT, glycerol-3-phosphate acyltransferase; LPAAT, 1-acyl-sn-glycerol-3-phosphate acyltransferase; PAP, phosphatidate phosphatase; DGAT, Diacylglycerol O-acyltransferase, type I; DGTT, Diacylglycerol O-acyltransferase, type II; DXS, 1-deoxy-d-xylulose 5-phosphate synthase; DXR, 1-deoxy-d-xylulose 5-phosphate reductoisomerase; CMS, 2-C-methyl-d-erythritol 4-phosphate cytidylyltransferase; CMK, 4-diphosphocytidyl-2-C-methyl-d-erythritol kinase; MCS, 2-C-methyl-d-erythritol 2,4-cyclodiphosphate synthase; HDS, 4-hydroxy-3-methylbut-2-en-1-yl diphosphate synthase; HDR, 4-hydroxy-3-methylbut-2-enyl diphosphate reductase; GPPS, geranyl diphosphate synthase; FPPS, farnesyl diphosphate synthase; GGPPS, geranylgeranyl diphosphate synthase; PSY, phytoene synthase; PDS, phytoene desaturase; ZISO, zeta-carotene isomerase; ZDS, zeta-carotene desaturase; CRTISO, carotenoid isomerase; LCYe, lycopene epsilon cyclase; LCYb, lycopene beta cyclase; CYP, cytochrome P450 beta hydroxylase; CHYb, beta-carotene hydroxylase; BKT, beta-carotene ketolase; AAT, long-chain-alcohol O-fatty-acyltransferase; ZEP, zeaxanthin epoxidase; NXS, neoxanthin synthase. GAP, glyceraldehyde 3-phosphate; DXP, 1-deoxy-d-xylulose 5-phosphate; CDP-ME, 4-(cytidine 5-diphosho)-2-C-methyl-d-erythritol; IPP, isopentenyl pyrophosphate; DMAPP, dimethylallyl pyrophosphate; HK, hexokinase; PGI, glucose-6-phosphate isomerase; FBP, fructose-1,6-bisphosphatase; FBA, fructose-bisphosphate aldolase; TIM, triosephosphate isomerase; GAPDH, glyceraldehyde 3-phosphate dehydrogenase; PGK, phosphoglycerate kinase; PGAM, phosphoglycerate mutase, 2,3-bisphosphoglycerate; ENO, enolase; PK, pyruvate kinase; G6PD, glucose-6-phosphate 1-dehydrogenase; PGLS, 6-phosphogluconolactonase; 6PGD, 6-phosphogluconate dehydrogenase; RPI, ribose 5-phosphate isomerase; RPE, ribulose-phosphate 3-epimerase; TRK, transketolase; PFK; PYC, pyruvate carboxylase; CIS, citrate synthase; ACH, aconitate hydratase; IDH, isocitrate dehydrogenase; OGDH, 2-oxoglutarate dehydrogenase; SCS, succinyl-CoA synthetase; SDH, succinate dehydrogenase; FHD, fumarate hydratase; MDH, malate dehydrogenase; PEPCK, phosphoenolpyruvate carboxykinase; PDHC, pyruvate dehydrogenase complex; ACS, AcCoA synthetase; ALDH, aldehyde dehydrogenase; PDC, pyruvate decarboxylase. G6P, glucose-6-phosphate; F6P, fructose-6-phosphate; F-1,6-BP, fructosel 1,6-bisphosphate; GA-1,3-BP, glyceraldehyde 1,3-biphosphate; PGA, phosphoglycerate; PEP, phosphoenolpyruvate; 6-PGL, 6-phosphogluconolactone; 6-PG, 6-phosphogluconate; Ru-5P, ribulose-5-phosphate; R-5P, ribose 5-phosphate; X-5P, xylulose 5-phosphate; 3PG, 3-phospho-D-glycerate; PYR, pyruvate; E4P, erythrose-4-phosphate; S7P, sedo heptulose-7-phosphate; CIT, citrate; ICIT isocitrate, AKG, α-Ketoglutarate; SUC, succinate; FUM, fumarate; MAL, malate; OAA, oxaloacetate.
